# Supplementary material for: Lung Ultrasound Scoring-Driven Precision: A Non-Invasive Paradigm for Optimal Surfactant Timing in Neonatal Meconium Aspiration Syndrome
Source: Research Square preprint supplement (doi:10.21203/rs.3.rs-6257579/v1), 2025-04-21
Supplement: Supplementary file 1 [file 5eb8a8141cbad50eee968e76.docx]

STROBE Statement—checklist of items that should be included in reports of observational studies

**Item**

**No Recommendation**

| **Title and abstract** | 1 | The study design is indicated in the title as a "prospective observational study." |
| --- | --- | --- |
| The abstract provides a balanced summary of the study's objectives, methods, results, and conclusions, including the use of lung ultrasound (LUS) scores to guide pulmonary surfactant (PS) application in meconium aspiration syndrome (MAS). |
| **Introduction** | | |
| Background/rationale | 2 | The introduction explains the scientific background of MAS, the controversy surrounding the timing of PS application, and the potential of LUS as a non-invasive, sensitive, and specific imaging technique for guiding PS use. |
| Objectives | 3 | The study aims to explore the predictive value of LUS scores for the timing of PS use in children with MAS. |
| **Methods** | | |
| Study design | 4 | The study is a prospective observational study conducted in two tertiary neonatal rescue centers. |
| Setting | 5 | The study was conducted between 2019 and 2024 in two academic, tertiary centers specializing in the treatment of severe neonates. |
| Participants | 6 | (*a*) **Eligibility Criteria:** Full-term newborns (gestational age 37-42 weeks) with clear amniotic fluid III° contamination and requiring NICU treatment were included (n=218). Exclusion criteria included newborns with good birth conditions and mother-baby rooming-in (n=294). |
| (*b*) **Follow-up:** Clinical details, including gestational age, gender, hospitalization status, and complications, were recorded. |
| Variables | 7 | **Outcomes:** Timing of PS use, LUS score, oxygenation index (OI), oxygen concentration, pH value, and X-ray grade.  **Exposures:** LUS score, oxygenation index, oxygen concentration, and pH value.  **Confounders:** Gestational age, birth weight, and persistent pulmonary hypertension (PPHN). |
| Data sources/ | 8* | LUS scores were assessed by two independent neonatologists using a blind evaluation method. Other variables (OI, oxygen concentration, pH) were recorded from electronic medical records. |
| measurement |  | - |
| Bias | 9 | Efforts to address bias included blinding the clinicians performing LUS to the clinical intervention plan and research hypothesis. |
| Study size | 10 | The sample size was calculated using G*Power 3.1 software, with a minimum required sample size of 200 cases. The study included 218 MAS infants, meeting the statistical power requirements. |
| Quantitative variables | 11 | Continuous variables were expressed as mean ± standard deviation. The ROC curve was used to analyze the predictive efficacy of LUS scores and other indicators. |

Statistical methods 12

Continued on next page

Multivariate logistic regression was used to control for confounding variables (gestational age, PPHN, etc.).

The ROC curve was used to determine the predictive efficiency of LUS scores and other indicators.

Sensitivity, specificity, and accuracy were calculated for each indicator.

- Participants 13* A total of 218 MAS infants were included in the study.Basic demographic and clinical characteristics of the participants are provided in Table

| (b) -  (c)- | | |
| --- | --- | --- |
| Descriptive | 14* |  |
| data |  | Table 1 provides detailed information on gestational age, LUS scores, oxygen concentration, pH, and other clinical variables. |
| (b) The number of participants with missing data is not explicitly mentioned, but all included cases had complete data for analysis. |
| (c) *-* |
| Outcome data | 15* | *Cohort study*— - |
| *Case-control study— -* |
| *Cross-sectional study—*The ROC curve analysis showed that the LUS score had the highest predictive efficiency for PS use (AUC=0.9886), with a sensitivity of 99% and specificity of 98%.  Other indicators (oxygen concentration, pH, OI) had lower predictive efficiency compared to LUS scores. |
| Main results | 16 | 1. The LUS score threshold of 5.5 (rounded to 6) was identified as the optimal cutoff for initiating PS treatment. 2. The LUS score was significantly better than traditional indicators (oxygenation index, oxygen concentration, and pH) in predicting the need for PS. |
| (*b*) Report category boundaries when continuous variables were categorized |
| (*c*) If relevant, consider translating estimates of relative risk into absolute risk for a meaningful time period |
| Other analyses | 17 | Report other analyses done—Subgroup analyses were not explicitly mentioned, but the study controlled for potential confounders such as gestational age and PPHN. |
| **Discussion** | | |
| Key results | 18 | The study demonstrated that LUS scores ≥ 6 are a reliable indicator for initiating PS treatment in MAS infants, with high sensitivity and specificity. |
| Limitations | 19 | The study acknowledges potential limitations, such as the single-center design and the need for further validation in larger, multicenter studies. |
| Interpretation | 20 | The results suggest that LUS can optimize the timing of PS use, reduce complications, and shorten hospital stays, making it a valuable tool in the management of MAS. |
| Generalisability | 21 | The findings are generalizable to full-term and near-term infants with MAS in similar clinical settings, but further studies are needed to confirm the results in other populations. |
| **Other information** | | |

Funding 22 The study does not explicitly mention funding sources or the role of funders.

*Give information separately for cases and controls in case-control studies and, if applicable, for exposed and unexposed groups in cohort and cross-sectional studies.

**Note:** An Explanation and Elaboration article discusses each checklist item and gives methodological background and published examples of transparent reporting. The STROBE checklist is best used in conjunction with this article (freely available on the Websites of PLoS Medicine at <http://www.plosmedicine.org/>, Annals of Internal Medicine at

<http://www.annals.org/>, and Epidemiology at <http://www.epidem.com/>). Information on the STROBE Initiative is available at www.strobe-statement.org.
